# Supplementary material for: The innovation of the symbiosome has enhanced the evolutionary stability of nitrogen fixation in legumes
Source: bioRxiv or medRxiv preprint supplement (doi:10.1101/2022.03.04.482842), 2022-03-05
Supplement: Supplementary file [file media-3.pdf]

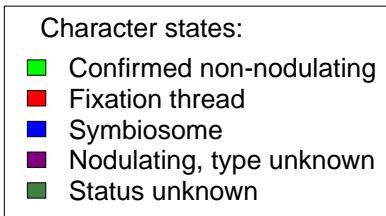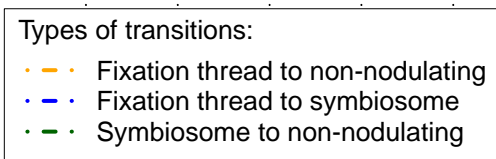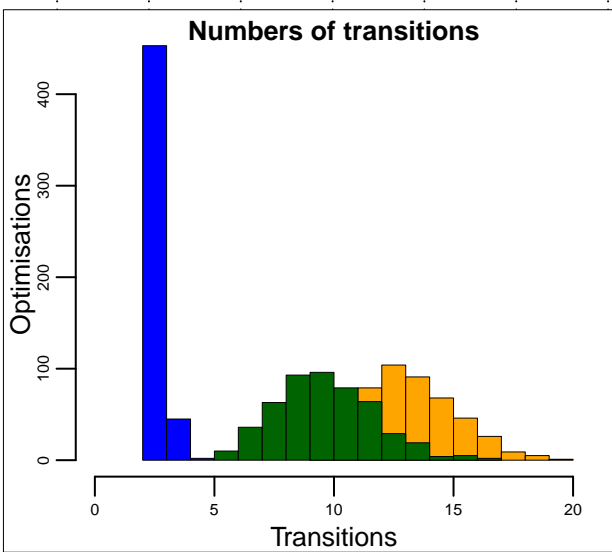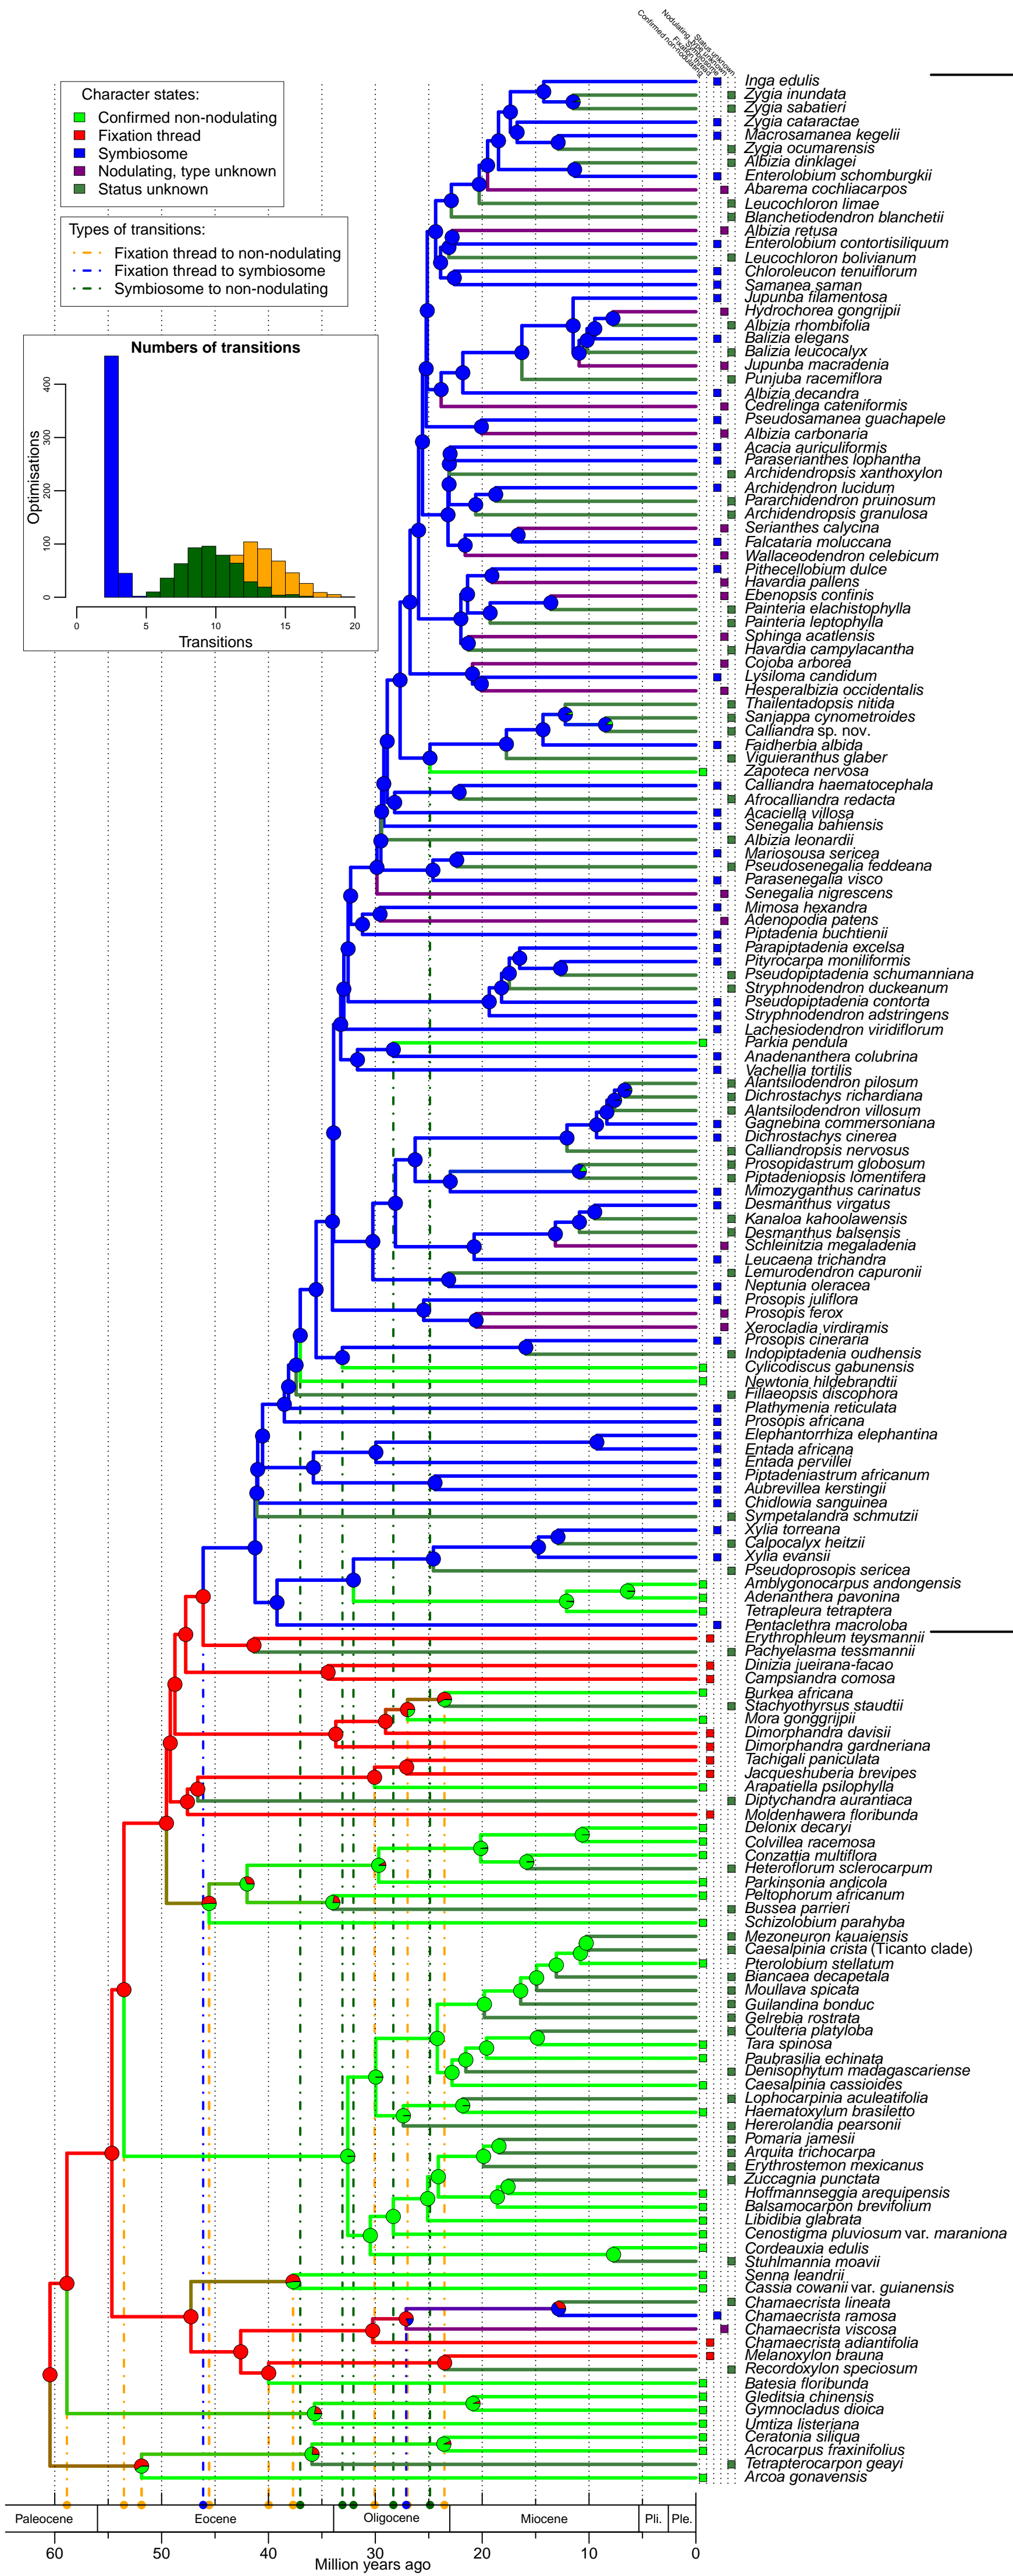

Mimosoid clade

- Inga edulis*
- Zygia inundata*
- Zygia sabatieri*
- Zygia cataractae*
- Macrosamanea kegelii*
- Zygia ocumarensis*
- Albizia dinklagei*
- Enterolobium schomburgkii*
- Abarema cochliacarpus*
- Leucochloron limae*
- Blanchetodendron blanchetii*
- Albizia retusa*
- Enterolobium contortisiliquum*
- Leucochloron bolivianum*
- Chloroleucon tenuiflorum*
- Samanea saman*
- Jupunba filamentosa*
- Hydrochorea gongrijpii*
- Albizia rhombifolia*
- Balizia elegans*
- Balizia leucocalyx*
- Jupunba macradenia*
- Punjuba racemiflora*
- Albizia decandra*
- Cedrelinga cateniformis*
- Pseudosamanea guachapele*
- Albizia carbonaria*
- Acacia auriculiformis*
- Paraserianthes lophantha*
- Archidendropsis xanthoxylon*
- Archidendron lucidum*
- Pararchidendron pruinosum*
- Archidendropsis granulosa*
- Serianthes calycina*
- Falcataria moluccana*
- Wallaceodendron celebicum*
- Pithecellobium dulce*
- Havardia pallens*
- Ebenopsis confinis*
- Painteria elachistophylla*
- Painteria leptophylla*
- Sphinga acatlensis*
- Havardia campylacantha*
- Cojoba arborea*
- Lysiloma candidum*
- Hesperalbizia occidentalis*
- Thailettadopsis nitida*
- Sanjappa cynometroides*
- Calliandra sp. nov.*
- Faidherbia albida*
- Viguierranthus glaber*
- Zapoteca nervosa*
- Calliandra haematocephala*
- Afrocalliandra redacta*
- Acaciella villosa*
- Senegalia bahiensis*
- Albizia leonardii*
- Mariosousa sericea*
- Pseudosenegalia feddeana*
- Parasenegalia visco*
- Senegalia nigrescens*
- Mimosa hexandra*
- Adenopodia patens*
- Piptadenia buchtienii*
- Parapiptadenia excelsa*
- Pityrocarpa moniliformis*
- Pseudopiptadenia schumanniana*
- Stryphnodendron ducleanum*
- Pseudopiptadenia contorta*
- Stryphnodendron adstringens*
- Lachesiodendron viridiflorum*
- Parkia pendula*
- Anadenanthera colubrina*
- Vachellia tortilis*
- Atlantiodendron pilosum*
- Dichrostachys richardiana*
- Atlantiodendron villosum*
- Gagnebina commersoniana*
- Dichrostachys cinerea*
- Calliandropsis nervosus*
- Prosopidastrum globosum*
- Piptadeniopsis lomentifera*
- Mimozyanthus carinatus*
- Desmanthus virgatus*
- Kanaloa kahoolawensis*
- Desmanthus balsensis*
- Schleinitzia megaladenia*
- Leucaena trichandra*
- Lemurodendron capuronii*
- Neptunia oleracea*
- Prosopis juliflora*
- Prosopis ferax*
- Xerocladia viridiramis*
- Prosopis cineraria*
- Indopiptadenia oudhensis*
- Cylicodiscus gabunensis*
- Newtonia hildebrandtii*
- Fillaeopsis discophora*
- Plathymentia reticulata*
- Prosopis africana*
- Elephantorrhiza elephantina*
- Entada africana*
- Entada pervillei*
- Piptadeniastrum africanum*
- Aubrevillea kerstingii*
- Chidlowia sanguinea*
- Sympetalandra schmutzii*
- Xylia torreana*
- Calpocalyx heitzii*
- Xylia evansii*
- Pseudoprosopis sericea*
- Amblygonocarpus andongensis*
- Adenanthera pavonina*
- Tetrapleura tetraptera*
- Pentaclethra maculoba*
- Erythrophleum teysmannii*
- Pachyelasma tessmannii*
- Dinizia jueirana-facao*
- Campsandra comosa*
- Burkea africana*
- Stachyothyrsus staudtii*
- Mora gongrijpii*
- Dimorphandra davisii*
- Dimorphandra gardneriana*
- Tachigali paniculata*
- Jacqueshuberia brevipes*
- Arapatiella psilophylla*
- Diptychandra aurantiaca*
- Moldenhawera floribunda*
- Delonix decaryi*
- Colvillea racemosa*
- Conzattia multiflora*
- Heteroflorum sclerocarpum*
- Parkinsonia andicola*
- Peltophorum africanum*
- Bussea parrieri*
- Schizolobium parahyba*
- Mezoneuron kauaiensis*
- Caesalpinia crista (Ticanto clade)*
- Pterolobium stellatum*
- Biancaea decapetala*
- Moullava spicata*
- Guilandina bonduc*
- Gelrebia rostrata*
- Coulteria platyloba*
- Tara spinosa*
- Paubrasilja echinata*
- Denisophytum madagascariense*
- Caesalpinia cassioides*
- Lophocarpinia aculeatifolia*
- Haematoxylum brasiletto*
- Hererolandia pearsonii*
- Pomaria jamesii*
- Arquita trichocarpa*
- Erythrostemon mexicanus*
- Zuccagnia punctata*
- Hoffmannseggia arequipensis*
- Balsamocarpum brevifolium*
- Libidibia glabrata*
- Cenostigma pluviosum var. maraniona*
- Cordeauxia edulis*
- Stuhlmannia moavii*
- Senna leandrii*
- Cassia cowanii var. guianensis*
- Chamaecrista lineata*
- Chamaecrista ramosa*
- Chamaecrista viscosa*
- Chamaecrista adiantifolia*
- Melanoxylon brauna*
- Recordoxylon speciosum*
- Batesia floribunda*
- Gleditsia chinensis*
- Gymnocladus dioica*
- Umtiza listeriana*
- Ceratonia siliqua*
- Acrocarpus fraxinifolius*
- Tetrapterocarpus geayi*
- Arcoa gonavensis*
